# Supplementary material
Source: Research Square preprint supplement (doi:10.21203/rs.3.rs-10037502/v1)
Supplement: Supplementary file 1 [file 51173f8391ff4c136d5819d9.docx]

## Additional files

Additional file 1: BMC_Anesthesiology_supplementary_information.docx. Supplementary figures and tables, including exploratory prediction model performance, predicted-risk groups, analytic-strategy consistency, subgroup and interaction analysis, and exploratory perioperative prediction model coefficients and performance.
